# Supplementary material for: Probing the inner local density of complex macromolecules by pyrene excimer formation
Source: Royal Society of Chemistry journal article supplement (doi:10.1039/d3cp02958a), 2023-01-01
Supplement: d3cp02958a1.pdf [file d3cp02958a1.pdf]

## Supporting Information

for

# Probing the Inner Local Density of Complex Macromolecules by Pyrene Excimer Formation

Hunter Little<sup>‡</sup>, Sanjay Patel<sup>‡</sup>, Jean Duhamel\*

Institute for Polymer Research, Waterloo Institute for Nanotechnology, Department of  
Chemistry, University of Waterloo, Waterloo, ON N2L 3G1, Canada

\* To Whom correspondence should be addressed

e-mail addresses: [htliddle@uwaterloo.ca](mailto:htliddle@uwaterloo.ca), [sr4patel@uwaterloo.ca](mailto:sr4patel@uwaterloo.ca), [jduhamel@uwaterloo.ca](mailto:jduhamel@uwaterloo.ca)

<sup>‡</sup> Both co-authors contributed equally to the study.

## Table of Content

|                                                                                                 |       |
|-------------------------------------------------------------------------------------------------|-------|
| A] <i>Fluorescence measurements</i> .....                                                       | S2    |
| B] <i>Global analysis of the monomer and excimer decays using the model free analysis</i> ..... | S2-S5 |
| C] <i>Parameters obtained from the fluorescence decay analyses</i> .....                        | S6-S8 |
| D] <i>References</i> .....                                                                      | S9    |

## **A) Fluorescence Measurements**

Fluorescence measurements were conducted on polymer solutions having an absorbance of 0.1 at 344 nm, which corresponded to a pyrene concentration of  $2.5 \times 10^{-6}$  M. The solutions were placed in quartz degassing cells and nitrogen gas (Praxair, 4.8-T) was bubbled for 30 minutes through the solutions in THF and toluene or for 45 minutes through the solutions in DMF and DMSO, to remove dissolved oxygen which is a known quencher of pyrene.

The time-resolved fluorescence decays were acquired using the right-angle geometry with a IBH Ltd. time-resolved fluorometer and excited at 344 nm using an IBH 340 NanoLED. The monomer and excimer fluorescence decays were acquired at 375 and 510 nm using a 370 and 495 nm cut-off filter to prevent scattered light from reaching the detector, respectively. For the Py-PC<sub>1</sub>A and Py-PNIPAM samples randomly labeled with pyrene and the Py-PNIPAM samples with a number average molecular weight ( $M_n$ ) of 5.9 and 7.6 kDa, both the monomer and excimer fluorescence decays were acquired up to 20,000 counts at the decay maximum. However, since the Py<sub>2</sub>-PNIPAM sample with an  $M_n$  of 13.7 kDa formed little excimer, its excimer fluorescence decays were acquired up to a decay maximum of 10,000 counts.

## **B) Time-Resolved Fluorescence Decay Analysis**

The time-resolved fluorescence decays of the monomer and excimer of the polymers randomly labeled with pyrene were analysed according to the fluorescence blob model (FBM) by fitting the decays globally to Equations S1 and S2, respectively.

$$\begin{aligned}
[Py^*] = & [Py^*_{diff}]_{t=0} \exp\left(-\left(A_2 + \frac{1}{\tau_M}\right)t - A_3(1 - \exp(-A_4t))\right) + \\
& \left([Py^*_{k2}]_{t=0} + [Py^*_{diff}]_{t=0} \exp(A_3) \sum_{i=0}^{\infty} \frac{A_3^i}{i!} \frac{A_2 + iA_4}{A_2 + iA_4 - k_2}\right) \exp\left(-\left(k_2 + \frac{1}{\tau_M}\right)t\right) \\
& - [Py^*_{diff}]_{t=0} \exp(A_3) \sum_{i=0}^{\infty} \frac{A_3^i}{i!} \frac{A_2 + iA_4}{A_2 + iA_4 - k_2} \exp\left(-\left(A_2 + iA_4 + \frac{1}{\tau_M}\right)t\right) \\
& + [Py^*_{free}]_{t=0} \exp\left(-\frac{t}{\tau_M}\right)
\end{aligned} \tag{S1}$$

$$\begin{aligned}
[E^*] = & k_2 \left([Py^*_{k2}]_{t=0} + [Py^*_{diff}]_{t=0} \exp(-A_3) \sum_{i=0}^{\infty} \frac{A_3^i}{i!} \frac{A_2 + iA_4}{A_2 + iA_4 - k_2}\right) \\
& \times \frac{\exp\left(-\frac{t}{\tau_{E0}}\right) - \exp\left(-\left(k_2 + \frac{1}{\tau_M}\right)t\right)}{k_2 + \frac{1}{\tau_M} - \frac{t}{\tau_{E0}}} + [Py^*_{diff}]_{t=0} \exp(-A_3) \\
& \times \sum_{i=0}^{\infty} \frac{A_3^i}{i!} \frac{A_2 + iA_4}{A_2 + iA_4 - k_2} \frac{\exp\left(-\left(A_2 + iA_4 + \frac{1}{\tau_M}\right)t\right) - \exp\left(-\frac{t}{\tau_{E0}}\right)}{A_2 + iA_4 + \frac{1}{\tau_M} - \frac{1}{\tau_{E0}}} \\
& + [E0^*]_{t=0} \times \exp\left(-\frac{t}{\tau_{E0}}\right) + [ED^*]_{t=0} \times \exp\left(-\frac{t}{\tau_D}\right)
\end{aligned} \tag{S2}$$

In Equations S1 and S2,  $\tau_M$ ,  $\tau_{E0}$ , and  $\tau_D$  are the lifetimes of the pyrene monomer and of the pyrene excimer formed with two properly and two poorly stacked pyrenyl moieties, respectively. Where  $\tau_M$  is fixed in the analysis,  $\tau_{E0}$ ,  $\tau_D$ , and the parameters  $A_2$ ,  $A_3$ , and  $A_4$  are optimized in the decay analysis.  $A_2$ ,  $A_3$ , and  $A_4$  are related to the average number  $\langle n \rangle$  of ground-state pyrenes in a *blob*, the rate constant  $k_{blob}$  for diffusive encounters between two structural units bearing a pyrenyl label, and the product  $k_e \times [blob]$  representing the exchange of ground-state pyrenyl labels between *blobs* according to Equation S3.<sup>1-2</sup>

$$A_2 = \langle n \rangle \frac{k_{blob} k_e [blob]}{k_{blob} + k_e [blob]} \quad (S3a)$$

$$A_3 = \langle n \rangle \left( \frac{k_{blob}}{k_{blob} + k_e [blob]} \right)^2 \quad (S3b)$$

$$A_4 = k_{blob} + k_e [blob] \quad (S3c)$$

The end-labeled polymers were analysed according to the model free analysis (MFA), which fits the monomer and excimer fluorescence decays globally according to Equations S4 and S5, respectively. In Equation S4, the parameters  $\tau_i$  are the decay times and their associated pre-exponential factors ( $a_i$ ) were normalized to unity ( $\sum a_i = 1$ ). The  $a_i$  and  $\tau_i$  values were kept the same in Equations S4 and S5 during the MFA of the fluorescence decays. The index “M” in the molar fractions  $f_{Mdiff}$  and  $f_{Mfree}$ , which represent the pyrenyl species that encounter each other through diffusion and do not form excimer and emit with their natural lifetime  $\tau_M$ , respectively, indicates that these pyrenyl species are only detected in the monomer decay.

$$[Py^*] = [Py^*]_{t=0} \left[ f_{Mdiff} \times \sum_{i=1}^n a_i \exp\left(\frac{-t}{\tau_i}\right) + f_{Mfree} \exp\left(\frac{-t}{\tau_M}\right) \right] \quad (S4)$$

$$[E^*] = [Py^*]_{t=0} \left[ -f_{EdiffE0} \times \sum_{i=1}^n a_i \frac{\frac{1}{\tau_i} - \frac{1}{\tau_M}}{\frac{1}{\tau_i} - \frac{1}{\tau_{E0}}} \exp\left(\frac{t}{\tau_i}\right) + (f_{EE0} + f_{EdiffE0}) \times \sum_{i=1}^n a_i \frac{\frac{1}{\tau_i} - \frac{1}{\tau_M}}{\frac{1}{\tau_i} - \frac{1}{\tau_{E0}}} \exp\left(\frac{t}{\tau_{E0}}\right) + f_{ED} \exp\left(\frac{t}{\tau_D}\right) \right] \quad (S5)$$

Equations S5 fits the excimer decay by assuming three possible excimer species. The short-lived ( $E0^*$ ) and long-lived ( $D^*$ ) excimer species with lifetimes  $\tau_{E0}$  and  $\tau_D$  are formed by excitation of well and poorly stacked pre-aggregated pyrenes and are represented by the molar fractions  $f_{EE0}$  and

$f_{ED}$ , respectively. The excimer species  $E0^*$  can also be formed by diffusive encounters and are represented by the molar fraction  $f_{EdiffE0}$ . The index “E” in the molar fractions indicates that these pyrenyl species were only detected in the excimer fluorescence decays.

### C] Parameters Retrieved from the Analysis of the TFR Decays

**Table S1.** Parameters obtained from the fit of the Py(x)-C1A monomer decays in toluene and DMF using the FBM program *globmis90bbg* where  $k_2$  is fixed in the analysis.

| Solvent                                                                                | Mol % | $k_{\text{blob}}$<br>( $10^{-6} \text{ s}^{-1}$ ) | $\langle n \rangle$ | $k_{\text{e}}[\text{blob}]$<br>( $10^{-6} \text{ s}^{-1}$ ) | $f_{\text{Mdiff}}$ | $f_{k_2}$ | $f_{\text{Mfree}}$ | $\chi^2$ |
|----------------------------------------------------------------------------------------|-------|---------------------------------------------------|---------------------|-------------------------------------------------------------|--------------------|-----------|--------------------|----------|
| Toluene<br>$k_2 = 2.03 \times 10^{-8} \text{ s}$<br>$\tau_{\text{M}} = 181 \text{ ns}$ | 1.7   | 18.5                                              | 1.33                | 9.44                                                        | 0.65               | 0.27      | 0.08               | 1.13     |
|                                                                                        | 2.6   | 12.9                                              | 2.10                | 7.05                                                        | 0.72               | 0.25      | 0.03               | 1.24     |
|                                                                                        | 3.0   | 14.3                                              | 2.05                | 6.49                                                        | 0.71               | 0.27      | 0.02               | 1.14     |
|                                                                                        | 6.2   | 15.0                                              | 3.76                | 10.05                                                       | 0.48               | 0.49      | 0.03               | 1.29     |
|                                                                                        | 6.7   | 15.5                                              | 3.84                | 6.49                                                        | 0.42               | 0.57      | 0.01               | 1.22     |
| DMF<br>$k_2 = 1.25 \times 10^{-8} \text{ s}$<br>$\tau_{\text{M}} = 165 \text{ ns}$     | 1.7   | 12.7                                              | 0.97                | 5.07                                                        | 0.75               | 0.17      | 0.09               | 1.29     |
|                                                                                        | 2.6   | 10.2                                              | 1.59                | 5.30                                                        | 0.71               | 0.24      | 0.04               | 1.22     |
|                                                                                        | 3.0   | 10.0                                              | 1.74                | 6.03                                                        | 0.68               | 0.25      | 0.07               | 1.20     |
|                                                                                        | 6.2   | 10.5                                              | 3.10                | 4.26                                                        | 0.52               | 0.46      | 0.02               | 1.29     |
|                                                                                        | 6.7   | 9.5                                               | 3.70                | 3.84                                                        | 0.44               | 0.55      | 0.01               | 1.26     |

**Table S2.** Parameters obtained from the fit of the Py(x)-C1A excimer decays in toluene and DMF using the FBM program *globmis90bbg* where  $k_2$  is fixed in the analysis.

| Solvent | Mol % | $f_{\text{Ek}2}$ | $\tau_{\text{E}0}$<br>(ns) | $f_{\text{E}0\text{diff}}$ | $f_{\text{E}E0}$ | $\tau_{\text{D}}$<br>(ns) | $f_{\text{ED}}$ | $\chi^2$ |
|---------|-------|------------------|----------------------------|----------------------------|------------------|---------------------------|-----------------|----------|
| Toluene | 1.7   | 0.28             | 51                         | 0.68                       | 0.034            | 150                       | 0.01            | 1.13     |
|         | 2.6   | 0.25             | 50                         | 0.71                       | 0.000            | 88                        | 0.04            | 1.24     |
|         | 3.0   | 0.27             | 51                         | 0.69                       | 0.020            | 76                        | 0.02            | 1.14     |
|         | 6.2   | 0.47             | 50                         | 0.46                       | 0.000            | 74                        | 0.08            | 1.29     |
|         | 6.7   | 0.51             | 50                         | 0.38                       | 0.086            | 82                        | 0.02            | 1.22     |
| DMF     | 1.7   | 0.18             | 58                         | 0.79                       | 0.000            | 86                        | 0.03            | 1.29     |
|         | 2.6   | 0.25             | 52                         | 0.73                       | 0.000            | 109                       | 0.02            | 1.22     |
|         | 3.0   | 0.26             | 52                         | 0.71                       | 0.000            | 115                       | 0.02            | 1.20     |
|         | 6.2   | 0.43             | 50                         | 0.48                       | 0.007            | 72                        | 0.08            | 1.29     |
|         | 6.7   | 0.51             | 51                         | 0.41                       | 0.027            | 73                        | 0.05            | 1.26     |

**Table S3.** Parameters obtained from the fit of the Py(*x*)-PNIPAM monomer decays in THF, DMF, and DMSO using the FBM program *globmis90bbg* where  $k_2$  is fixed in the analysis.

| Solvent                                                                    | Mol % | $k_{\text{blob}}$<br>( $10^{-6} \text{ s}^{-1}$ ) | $\langle n \rangle$ | $k_e[\text{blob}]$<br>( $10^{-6} \text{ s}^{-1}$ ) | $f_{\text{Mdiff}}$ | $f_{k_2}$ | $f_{\text{Mfree}}$ | $\chi^2$ |
|----------------------------------------------------------------------------|-------|---------------------------------------------------|---------------------|----------------------------------------------------|--------------------|-----------|--------------------|----------|
| THF<br>$k_2 = 0.91 \times 10^{-8} \text{ s}$<br>$\tau_M = 184 \text{ ns}$  | 2.7   | 5.6                                               | 1.3                 | 3.07                                               | 0.48               | 0.22      | 0.30               | 1.06     |
|                                                                            | 3.6   | 5.9                                               | 1.6                 | 5.15                                               | 0.53               | 0.33      | 0.14               | 1.13     |
|                                                                            | 4.2   | 7.3                                               | 1.4                 | 4.82                                               | 0.60               | 0.33      | 0.07               | 1.08     |
|                                                                            | 5.1   | 5.6                                               | 2.2                 | 4.00                                               | 0.54               | 0.43      | 0.04               | 1.21     |
|                                                                            | 6.3   | 4.7                                               | 3.0                 | 3.40                                               | 0.49               | 0.48      | 0.03               | 1.14     |
| DMF<br>$k_2 = 1.15 \times 10^{-8} \text{ s}$<br>$\tau_M = 166 \text{ ns}$  | 2.7   | 10.2                                              | 0.84                | 5.74                                               | 0.61               | 0.17      | 0.22               | 1.14     |
|                                                                            | 3.6   | 10.2                                              | 1.15                | 6.05                                               | 0.68               | 0.23      | 0.10               | 1.12     |
|                                                                            | 4.2   | 11.0                                              | 1.21                | 6.52                                               | 0.72               | 0.23      | 0.05               | 1.13     |
|                                                                            | 5.1   | 8.0                                               | 1.89                | 5.09                                               | 0.65               | 0.33      | 0.02               | 1.06     |
|                                                                            | 6.3   | 8.8                                               | 2.08                | 6.59                                               | 0.61               | 0.36      | 0.03               | 1.07     |
| DMSO<br>$k_2 = 0.97 \times 10^{-8} \text{ s}$<br>$\tau_M = 136 \text{ ns}$ | 2.7   | 15.3                                              | 0.65                | 6.63                                               | 0.57               | 0.13      | 0.29               | 1.14     |
|                                                                            | 3.6   | 11.2                                              | 0.92                | 6.33                                               | 0.68               | 0.19      | 0.13               | 1.23     |
|                                                                            | 4.2   | 12.7                                              | 0.93                | 8.29                                               | 0.71               | 0.18      | 0.10               | 1.16     |
|                                                                            | 5.1   | 7.8                                               | 1.52                | 6.05                                               | 0.68               | 0.27      | 0.05               | 1.14     |
|                                                                            | 6.3   | 8.2                                               | 1.72                | 6.19                                               | 0.65               | 0.31      | 0.04               | 1.09     |

**Table S4.** Parameters obtained from the fit of the Py(*x*)-PNIPAM excimer decays in THF, DMF, and DMSO using the FBM program *globmis90bbg* where  $k_2$  is fixed in the analysis.

| Solvent | Mol % | $f_{EK_2}$ | $\tau_{E0}$<br>(ns) | $f_{E0diff}$ | $f_{EE0}$ | $\tau_D$<br>(ns) | $f_{ED}$ | $\chi^2$ |
|---------|-------|------------|---------------------|--------------|-----------|------------------|----------|----------|
| THF     | 2.7   | 0.26       | 50                  | 0.58         | 0.053     | 130              | 0.11     | 1.06     |
|         | 3.6   | 0.32       | 56                  | 0.53         | 0.112     | 150              | 0.03     | 1.13     |
|         | 4.2   | 0.29       | 57                  | 0.53         | 0.152     | 126              | 0.03     | 1.08     |
|         | 5.1   | 0.38       | 57                  | 0.48         | 0.129     | 157              | 0.01     | 1.21     |
|         | 6.3   | 0.42       | 52                  | 0.44         | 0.064     | 95               | 0.08     | 1.14     |
| DMF     | 2.7   | 0.19       | 47                  | 0.70         | 0.013     | 108              | 0.09     | 1.14     |
|         | 3.6   | 0.22       | 49                  | 0.65         | 0.000     | 98               | 0.13     | 1.12     |
|         | 4.2   | 0.21       | 51                  | 0.65         | 0.057     | 92               | 0.09     | 1.13     |
|         | 5.1   | 0.31       | 52                  | 0.61         | 0.029     | 90               | 0.05     | 1.06     |
|         | 6.3   | 0.34       | 51                  | 0.58         | 0.058     | 101              | 0.02     | 1.07     |
| DMSO    | 2.7   | 0.16       | 48                  | 0.68         | 0.068     | 103              | 0.09     | 1.14     |
|         | 3.6   | 0.19       | 47                  | 0.67         | 0.016     | 94               | 0.12     | 1.23     |
|         | 4.2   | 0.18       | 46                  | 0.69         | 0.000     | 90               | 0.13     | 1.16     |
|         | 5.1   | 0.26       | 49                  | 0.66         | 0.035     | 94               | 0.04     | 1.14     |
|         | 6.3   | 0.29       | 49                  | 0.62         | 0.063     | 98               | 0.03     | 1.09     |



**Table S5.** Parameters obtained from the fit of the Py<sub>2</sub>-PNIPAM monomer decays in THF and DMF using the MFA program *sumegs12bg*.

| Solvent                  | MW (kDa) | DP  | $\tau_1$ | $a_1$ | $\tau_2$ | $a_2$ | $f_{Mfree}$ | $\chi^2$ |
|--------------------------|----------|-----|----------|-------|----------|-------|-------------|----------|
| THF<br>$\tau_M = 203$ ns | 5.9      | 52  | 46       | 0.09  | 149      | 0.78  | 0.01        | 1.12     |
|                          | 7.6      | 67  | 51       | 0.08  | 161      | 0.80  | 0.12        | 1.09     |
|                          | 13.7     | 121 | 47       | 0.05  | 180      | 0.94  | 0.01        | 1.01     |
| DMF<br>$\tau_M = 166$ ns | 5.9      | 52  | 50       | 0.06  | 134      | 0.81  | 0.14        | 1.00     |
|                          | 7.6      | 67  | 49       | 0.06  | 143      | 0.84  | 0.10        | 1.06     |
|                          | 13.7     | 121 | 36       | 0.03  | 151      | 0.57  | 0.40        | 0.97     |

**Table S6.** Parameters obtained from the fit of the Py<sub>2</sub>-PNIPAM excimer decays in THF and DMF using the MFA program *sumegs12bg*.

| Solvent                  | MW (kDa) | DP  | $f_{diff}^{E0}$ | $\tau_{E0}$ (ns) | $\tau_D$ (ns) | $f_{EE0}$ | $f_{ED}$ | $\chi^2$ |
|--------------------------|----------|-----|-----------------|------------------|---------------|-----------|----------|----------|
| THF<br>$\tau_M = 203$ ns | 5.9      | 52  | 0.98            | 70               | 117           | 0.000     | 0.018    | 1.12     |
|                          | 7.6      | 67  | 0.99            | 73               | 150           | 0.012     | 0.001    | 1.09     |
|                          | 13.7     | 121 | 0.98            | 81               | 107           | 0.017     | 0.001    | 1.01     |
| DMF<br>$\tau_M = 166$ ns | 5.9      | 52  | 0.98            | 63               | 153           | 0.010     | 0.01     | 1.00     |
|                          | 7.6      | 67  | 0.99            | 72               | 123           | 0.000     | 0.01     | 1.06     |
|                          | 13.7     | 121 | 0.97            | 79               | 156           | 0.010     | 0.02     | 0.97     |

\*\*Due to the greatly reduced excimer formed in DMF ( $\eta = 0.79$  mPa.s), the Py<sub>2</sub>-PNIPAM samples were not acquired in DMSO ( $\eta = 2.0$  mPa.s).

## C| REFERENCES

1. Ingratta, M.; Mathew, M.; Duhamel, J. How Switching the Substituent of a Pyrene Derivative from a Methyl to a Butyl Affects the Fluorescence Response of Polystyrene Randomly Labeled with Pyrene. *Can. J. Chem.* **2010**, *88*, 217–227.
2. Duhamel, J. New Insights in the Study of Pyrene Excimer Fluorescence to Characterize Macromolecules and Their Supramolecular Assemblies in Solution. *Langmuir* **2012**, *28*, 6527–6538.
